# Supplementary material for: B355252 Suppresses LPS-Induced Neuroinflammation in the Mouse Brain
Source: MDPI journal article supplement (doi:10.3390/brainsci14050467), 2024-05-07
Supplement: s1 [file s1]

Figure S1. TUNEL Staining.

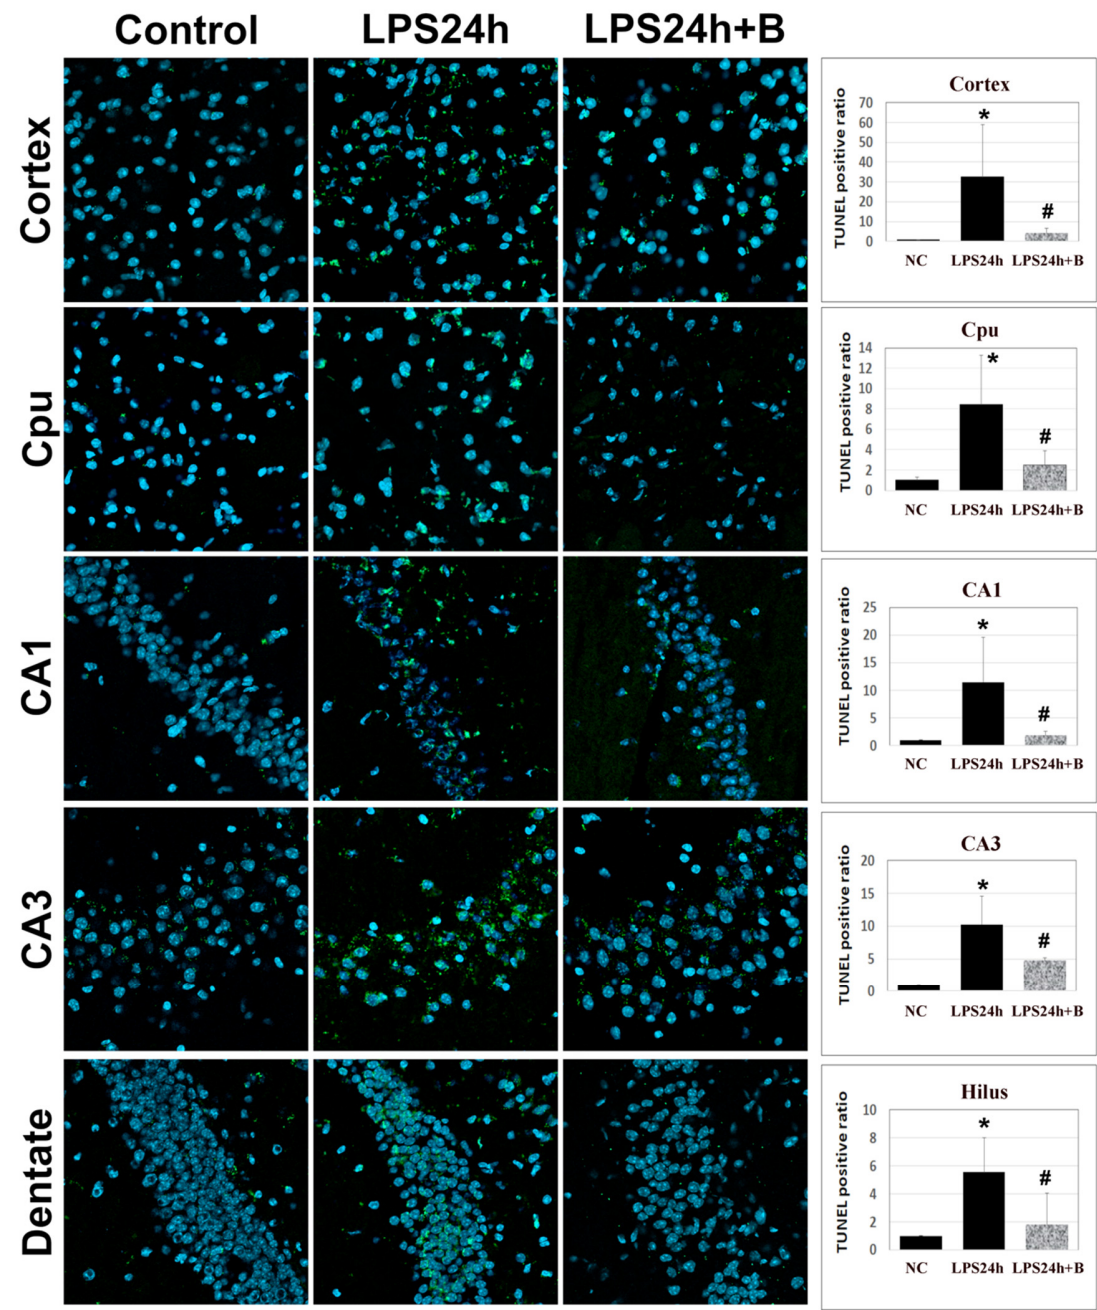

Green color, TUNEL; Blue color, DAPI.

**Table S1. Protein expression of 111 cytokines in each group.**

Values in NC were set as 1 and relative fold changes were given in LPS24h, LPS24+B and d B groups.

| Analyte                              | Location | Number | NC | LPS24h | LPS24h+B | B only |
|--------------------------------------|----------|--------|----|--------|----------|--------|
| Adiponectin/Acrp30                   | A3,4     | 1      | 1  | 2.523  | 0.732    | 1.167  |
| Amphiregulin                         | A5,6     | 2      | 1  | 3.154  | 1.305    | 0.907  |
| Angiopoietin-1                       | A7,8     | 3      | 1  | 2.242  | 1.298    | 0.927  |
| Angiopoietin-2                       | A9,10    | 4      | 1  | 3.157  | 1.335    | 0.822  |
| Angiopoietin-like 3                  | A11,12   | 5      | 1  | 2.620  | 1.065    | 0.972  |
| BAFF/BLyS/TNFSF13B                   | A13,14   | 6      | 1  | 2.674  | 1.044    | 1.493  |
| C1q R1/CD93                          | A15,16   | 7      | 1  | 2.441  | 1.026    | 0.736  |
| CCL2/JE/MCP-1                        | A17,18   | 8      | 1  | 3.152  | 1.502    | 1.396  |
| CCL3/CCL4/MIP-1 $\alpha$ / $\beta$   | A19,20   | 9      | 1  | 2.253  | 1.392    | 1.373  |
| CCL5/RANTES                          | A21,22   | 10     | 1  | 2.331  | 6.271    | 0.820  |
| CCL6/C10                             | B3,4     | 11     | 1  | 2.763  | 1.134    | 1.022  |
| CCL11/Eotaxin                        | B5,6     | 12     | 1  | 3.582  | 1.772    | 0.918  |
| CCL12/MCP-5                          | B7,8     | 13     | 1  | 3.050  | 1.219    | 0.722  |
| CCL17/TARC                           | B9,10    | 14     | 1  | 2.913  | 1.573    | 0.886  |
| CCL19/MIP-3 $\beta$                  | B11,12   | 15     | 1  | 2.073  | 1.324    | 0.914  |
| CCL20/MIP-3 $\alpha$                 | B13,14   | 16     | 1  | 1.920  | 0.979    | 1.460  |
| CCL21/6Ckine                         | B15,16   | 17     | 1  | 0.377  | 0.230    | 0.122  |
| CCL22/MDC                            | B17,18   | 18     | 1  | 3.279  | 1.985    | 0.978  |
| CD14                                 | B19,20   | 19     | 1  | 1.982  | 1.373    | 0.666  |
| CD40/TNFRSF5                         | B21,22   | 20     | 1  | 2.283  | 1.944    | 1.041  |
| CD160                                | C3,4     | 21     | 1  | 2.094  | 1.175    | 0.873  |
| Chemerin                             | C5,6     | 22     | 1  | 3.276  | 1.187    | 1.109  |
| Chitinase 3-like 1                   | C7,8     | 23     | 1  | 4.807  | 2.907    | 1.115  |
| Coagulation Factor III/Tissue Factor | C9,10    | 24     | 1  | 1.121  | 1.205    | 1.204  |
| Complement Component C5/C5a          | C11,12   | 25     | 1  | 1.743  | 0.876    | 0.884  |
| Complement Factor D                  | C13,14   | 26     | 1  | 1.533  | 0.776    | 1.122  |
| C-Reactive Protein/CRP               | C15,16   | 27     | 1  | 1.609  | 0.722    | 0.447  |
| CX3CL1/Fractalkine                   | C17,18   | 28     | 1  | 0.778  | 0.969    | 0.860  |
| CXCL1/KC                             | C19,20   | 29     | 1  | 2.755  | 7.182    | 1.349  |
| CXCL2/MIP-2                          | C21,22   | 30     | 1  | 2.413  | 1.994    | 0.843  |
| CXCL9/MIG                            | D1,2     | 31     | 1  | 3.012  | 0.925    | 1.378  |
| CXCL10/IP-10                         | D3,4     | 32     | 1  | 7.566  | 21.554   | 1.567  |
| CXCL11/I-TAC                         | D5,6     | 33     | 1  | 2.272  | 1.260    | 1.359  |
| CXCL13/BLC/BCA-1                     | D7,8     | 34     | 1  | 2.878  | 1.288    | 0.676  |

|                       |        |    |   |       |       |       |
|-----------------------|--------|----|---|-------|-------|-------|
| CXCL16                | D9,10  | 35 | 1 | 2.495 | 1.564 | 0.841 |
| Cystatin C            | D11,12 | 36 | 1 | 1.489 | 1.900 | 2.292 |
| DKK-1                 | D13,14 | 37 | 1 | 1.371 | 1.025 | 1.346 |
| DPPIV/CD26            | D15,16 | 38 | 1 | 1.167 | 0.943 | 0.794 |
| EGF                   | D17,18 | 39 | 1 | 0.449 | 0.235 | 0.186 |
| Endoglin/CD105        | D19,20 | 40 | 1 | 1.189 | 0.964 | 0.498 |
| Endostatin            | D21,22 | 41 | 1 | 3.000 | 1.599 | 0.949 |
| Fetuin A/AHSG         | D23,24 | 42 | 1 | 2.810 | 2.165 | 1.992 |
| FGF acidic            | E1,2   | 43 | 1 | 1.526 | 1.748 | 2.055 |
| FGF-21                | E3,4   | 44 | 1 | 2.466 | 1.255 | 1.277 |
| Flt-3 Ligand          | E5,6   | 45 | 1 | 2.041 | 1.060 | 0.619 |
| Gas 6                 | E7,8   | 46 | 1 | 2.780 | 1.175 | 0.704 |
| G-CSF                 | E9,10  | 47 | 1 | 2.050 | 1.666 | 1.208 |
| GDF-15                | E11,12 | 48 | 1 | 2.097 | 1.008 | 0.594 |
| GM-CSF                | E13,14 | 49 | 1 | 2.095 | 2.320 | 1.308 |
| HGF                   | E15,16 | 50 | 1 | 1.379 | 0.765 | 0.480 |
| ICAM-1/CD54           | E17,18 | 51 | 1 | 3.584 | 6.811 | 0.488 |
| IFN- $\gamma$         | E19,20 | 52 | 1 | 2.364 | 1.139 | 1.289 |
| IGFBP-1               | E21,22 | 53 | 1 | 2.871 | 1.421 | 1.259 |
| IGFBP-2               | E23,24 | 54 | 1 | 1.540 | 1.064 | 0.833 |
| IGFBP-3               | F1,2   | 55 | 1 | 2.351 | 1.248 | 0.846 |
| IGFBP-5               | F3,4   | 56 | 1 | 2.686 | 1.852 | 0.665 |
| IGFBP-6               | F5,6   | 57 | 1 | 1.637 | 1.434 | 0.758 |
| IL-1 $\alpha$ /IL-1F1 | F7,8   | 58 | 1 | 2.337 | 1.080 | 1.234 |
| IL-1 $\beta$ /IL-1F2  | F9,10  | 59 | 1 | 1.840 | 1.379 | 1.413 |
| IL-1ra/IL-1F3         | F11,12 | 60 | 1 | 1.723 | 1.180 | 1.190 |
| IL-2                  | F13,14 | 61 | 1 | 3.740 | 1.174 | 2.505 |
| IL-3                  | F15,16 | 62 | 1 | 2.309 | 1.582 | 1.976 |
| IL-4                  | F17,18 | 63 | 1 | 1.654 | 1.390 | 1.615 |
| IL-5                  | F19,20 | 64 | 1 | 1.911 | 0.965 | 1.420 |
| IL-6                  | F21,22 | 65 | 1 | 2.521 | 1.093 | 1.759 |
| IL-7                  | F23,24 | 66 | 1 | 2.253 | 1.347 | 0.668 |
| IL-10                 | G1,2   | 67 | 1 | 2.106 | 1.229 | 1.219 |
| IL-11                 | G3,4   | 68 | 1 | 2.431 | 1.469 | 1.210 |
| IL-12 p40             | G5,6   | 69 | 1 | 2.490 | 1.505 | 0.863 |
| IL-13                 | G7,8   | 70 | 1 | 3.355 | 1.246 | 1.272 |
| IL-15                 | G9,10  | 71 | 1 | 1.417 | 1.493 | 1.169 |
| IL-17A                | G11,12 | 72 | 1 | 1.772 | 1.215 | 2.066 |
| IL-22                 | G13,14 | 73 | 1 | 1.873 | 0.955 | 1.803 |

|                                 |        |     |   |        |        |       |
|---------------------------------|--------|-----|---|--------|--------|-------|
| IL-23                           | G15,16 | 74  | 1 | 1.985  | 0.850  | 1.632 |
| IL-27 p28                       | G17,18 | 75  | 1 | 2.084  | 1.422  | 1.307 |
| IL-28A/B                        | G19,20 | 76  | 1 | 2.035  | 1.166  | 0.931 |
| IL-33                           | G21,22 | 77  | 1 | 3.238  | 2.683  | 0.435 |
| LDL R                           | G23,24 | 78  | 1 | 2.565  | 2.328  | 0.836 |
| Leptin                          | H1,2   | 79  | 1 | 2.366  | 1.563  | 1.646 |
| LIF                             | H3,4   | 80  | 1 | 1.580  | 1.239  | 1.061 |
| Lipocalin-2/NGAL                | H5,6   | 81  | 1 | 12.597 | 12.702 | 0.697 |
| LIX                             | H7,8   | 82  | 1 | 2.588  | 1.098  | 1.414 |
| M-CSF                           | H9,10  | 83  | 1 | 1.577  | 1.601  | 1.173 |
| MMP-2                           | H11,12 | 84  | 1 | 1.631  | 0.743  | 0.619 |
| MMP-3                           | H13,14 | 85  | 1 | 2.423  | 1.051  | 1.956 |
| MMP-9                           | H15,16 | 86  | 1 | 2.871  | 1.412  | 2.507 |
| Myeloperoxidase                 | H17,18 | 87  | 1 | 4.501  | 7.489  | 0.613 |
| Osteopontin (OPN)               | H19,20 | 88  | 1 | 2.506  | 2.765  | 1.615 |
| Osteoprotegerin/TNFRSF11B       | H21,22 | 89  | 1 | 2.121  | 1.102  | 1.512 |
| PD-ECGF/Thymidine phosphorylase | H23,24 | 90  | 1 | 1.973  | 0.930  | 1.187 |
| PDGF-BB                         | I1,2   | 91  | 1 | 2.854  | 1.112  | 0.762 |
| Pentraxin 2/SAP                 | I3,4   | 92  | 1 | 7.200  | 3.700  | 0.647 |
| Pentraxin 3/TSG-14              | I5,6   | 93  | 1 | 2.768  | 1.349  | 1.381 |
| Periostin/OSF-2                 | I7,8   | 94  | 1 | 1.647  | 1.176  | 2.008 |
| Pref-1/DLK-1/FA1                | I9,10  | 95  | 1 | 0.953  | 1.188  | 0.850 |
| Proliferin                      | I11,12 | 96  | 1 | 2.317  | 1.234  | 1.352 |
| Proprotein Convertase 9/PCSK9   | I13,14 | 97  | 1 | 2.101  | 1.130  | 0.619 |
| RAGE                            | I15,16 | 98  | 1 | 1.398  | 0.693  | 0.526 |
| RBP4                            | I17,18 | 99  | 1 | 1.495  | 1.482  | 0.935 |
| Reg3G                           | I19,20 | 100 | 1 | 8.960  | 5.390  | 0.797 |
| Resistin                        | I21,22 | 101 | 1 | 2.534  | 1.383  | 1.558 |
| E-Selectin/CD62E                | J3,4   | 102 | 1 | 2.163  | 1.349  | 1.242 |
| P-Selectin/CD62P                | J5,6   | 103 | 1 | 2.438  | 1.192  | 1.979 |
| Serpin E1/PAI-1                 | J7,8   | 104 | 1 | 2.171  | 0.989  | 1.537 |
| Serpin F1/PEDF                  | J9,10  | 105 | 1 | 0.946  | 0.717  | 1.107 |
| Thrombopoietin                  | J11,12 | 106 | 1 | 2.115  | 1.151  | 1.510 |
| TIM-1/KIM-1/HAVCR               | J13,14 | 107 | 1 | 2.422  | 1.478  | 2.247 |
| TNF- $\alpha$                   | J15,16 | 108 | 1 | 2.025  | 1.127  | 1.129 |
| VCAM-1/CD106                    | J17,18 | 109 | 1 | 1.696  | 1.745  | 0.757 |
| VEGF                            | J19,20 | 110 | 1 | 1.846  | 1.103  | 1.179 |
| WISP-1/CCN4                     | J21,22 | 111 | 1 | 2.824  | 1.352  | 1.421 |
